# Supplementary material for: Quantum dynamics analysis of transition-state spectrum for the SH + H2S → H2S + SH reaction
Source: Royal Society of Chemistry journal article supplement (doi:10.1039/d0cp03072d), 2020-01-01
Supplement: d0cp03072d1.pdf [file d0cp03072d1.pdf]

## Electronic Supplementary Information

### Quantum dynamics analysis of transition-state spectrum for the $\text{SH} + \text{H}_2\text{S} \rightarrow \text{H}_2\text{S} + \text{SH}$ reaction.

Toshiyuki Takayanagi\*

Department of Chemistry, Saitama University, 255 Shimo-Okubo, Sakura-ku, Saitama City,  
Saitama 338-8570, Japan

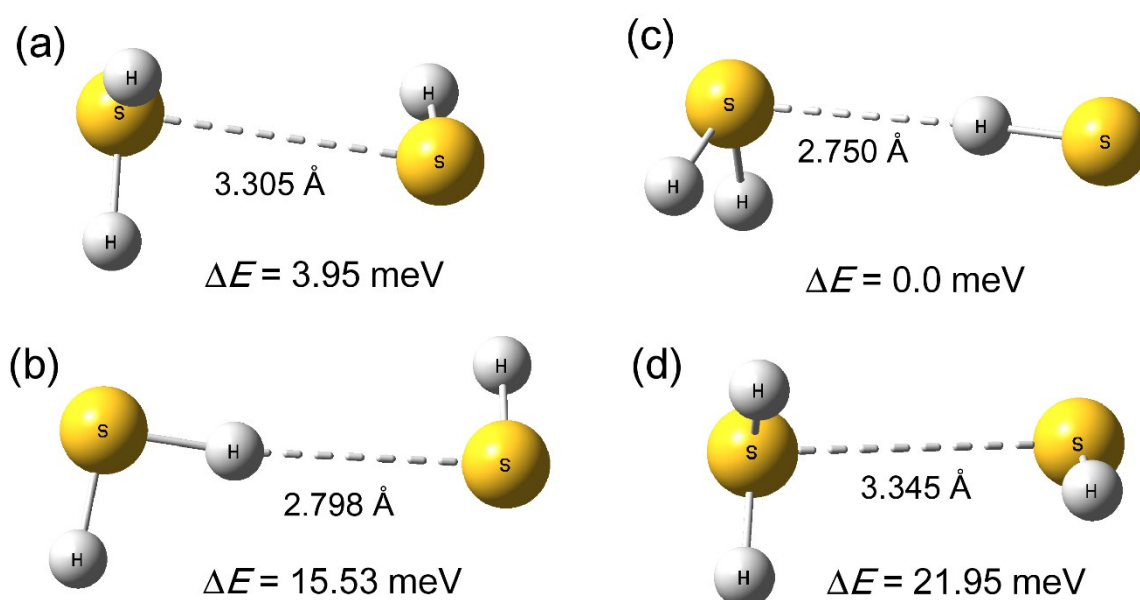

**Fig. S1**

Molecular structures of the  $\text{SH} \cdots \text{H}_2\text{S}$  complex optimized at the MP2/aug-cc-pVDZ level of theory. Relative energies are also shown.

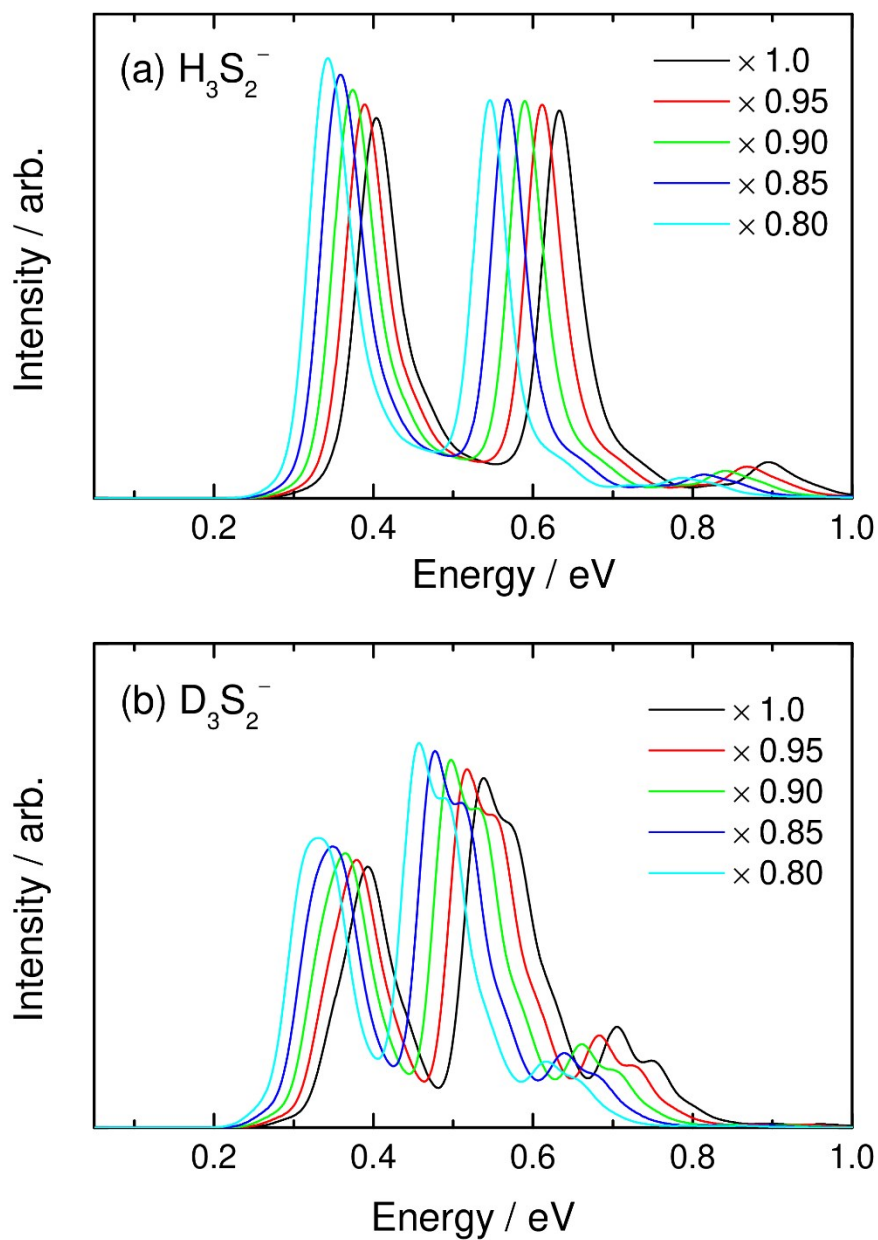

**Fig. S2**

Effect of a scale factor (0.80–1.0) on the calculated photodetachment spectra of the (a)  $\text{H}_3\text{S}_2^-$  and (b)  $\text{D}_3\text{S}_2^-$  anions. The neural MP2 potential energy surface is used for scaling. Energy is measured from the asymptotic  $\text{SH} + \text{H}_2\text{S}$  potential energy minimum.
